# Supplementary material
Source: Royal Society of Chemistry journal article supplement (doi:10.1039/d6nr00435k)
Supplement: d6nr00435k1.pdf [file d6nr00435k1.pdf]

**Design of MnO<sub>2</sub>-based catalysts with activity approaching Pt/C via  
machine learning**

**Huang Jiasheng<sup>a</sup>, Li Jiangtao<sup>a</sup>, Zhu Yuhao<sup>a</sup>, Wang Zehao<sup>a</sup>, Xu Jian<sup>a</sup>, Wang Fu  
<sup>a</sup>, Xia Lan<sup>a</sup>, Miao He<sup>a\*</sup>, Yuan Jinliang<sup>a</sup>**

<sup>a</sup> Faculty of Maritime and Transportation, Ningbo University, Ningbo 315211, PR  
China

\* Corresponding authors:

Prof. He Miao, E-mail: [miaohe@nbu.edu.cn](mailto:miaohe@nbu.edu.cn)

### ■ Chemical reagents

KMnO<sub>4</sub> (AR), Al(NO<sub>3</sub>)<sub>3</sub>·9H<sub>2</sub>O (AR), Cr(NO<sub>3</sub>)<sub>3</sub>·9H<sub>2</sub>O (AR), Fe(NO<sub>3</sub>)<sub>3</sub>·9H<sub>2</sub>O (AR), Co(NO<sub>3</sub>)<sub>2</sub>·6H<sub>2</sub>O (AR), Ni(NO<sub>3</sub>)<sub>2</sub>·6H<sub>2</sub>O (AR), Sr(NO<sub>3</sub>)<sub>2</sub>·4H<sub>2</sub>O (AR), Cd(NO<sub>3</sub>)<sub>2</sub>·4H<sub>2</sub>O (AR), Ce(NO<sub>3</sub>)<sub>3</sub>·6H<sub>2</sub>O (AR), Pr(NO<sub>3</sub>)<sub>3</sub>·6H<sub>2</sub>O (AR), Nd(NO<sub>3</sub>)<sub>3</sub>·6H<sub>2</sub>O (AR), Sm(NO<sub>3</sub>)<sub>3</sub>·6H<sub>2</sub>O (AR), Gd(NO<sub>3</sub>)<sub>3</sub>·6H<sub>2</sub>O (AR), KOH (AR), C<sub>2</sub>H<sub>5</sub>OH (AR), Pt/C, Aluminum foil, Polytetrafluoroethylene preparation (PTFE, 60 wt.%), were purchased from Aladdin Ltd. Conductive carbon (VXC-72) was purchased from Cabot Ltd., and Nafion solution (5 wt%, 80 μL) was obtained from DuPont Ltd. Ni foam was purchased from Sinero Co. Ltd. All chemical reagents in the Experimental section were used directly without the further treatment.

### ■ Material characterization

X-ray diffraction (XRD) patterns were obtained on a Bruker D8 Advance X-ray diffract meter (Cu K $\alpha$  = 1.5418 Å, Bruker Ltd., Karlsruhe, Germany) at a scanning rate of 0.02° s<sup>-1</sup> from 10° to 90°. The microstructures and elemental distributions of the synthesized samples were observed using field emission scanning electron microscopy (FESEM, Hitachi S4800, 5 kV, Hitachi Ltd., Tokyo, Japan), transmission electron microscopy (TEM, JF-20, Hitachi), and high-resolution transmission electron microscopy (HRTEM, JF-20, Hitachi).

### ■ Preparation of working electrode

The working electrode was prepared as follows: the catalyst inks were prepared by dispersing 5 mg catalysts and 5 mg carbon (Vulcan-XC72) in 2 mL absolute ethanol, and then 80 μL 5 wt% Nafion solution (DuPont) was added and ultrasonically blended for 1 h to form a well-dispersed ink. 20 μL catalyst ink was carefully dropped onto the glassy carbon electrode (5 mm in diameter) with the catalyst loading of 255 μg cm<sup>-2</sup>. The working electrodes were then dried in air at room temperature for 1 hour. For comparison, the catalyst of 20 wt% Pt/C (Aladdin Corp.) with the same mass loading were also applied to prepare the working electrode.

### ■ Measurement of working electrode

ORR measurements were conducted in an O<sub>2</sub>-saturated 0.1 M KOH solution using a rotating disk electrode (rotation speed fixed at 1600 rpm). Linear sweep voltammetry

(LSV) curves were recorded within a potential range of +0.2 V to -0.8 V (vs. Hg/HgO) at a scan rate of 5 mV s<sup>-1</sup>. To investigate the reaction pathway during ORR, a rotating ring-disk electrode (RRDE) was employed. A constant potential of 1.4 V (vs. RHE) was applied to the ring electrode to detect hydrogen peroxide generated at the disk electrode. Based on the measured ring current ( $I_{ring}$ ), disk current ( $I_{disk}$ ), and the known collection efficiency ( $N$ ) of the ring, the percentage of hydrogen peroxide intermediate ( $X(\text{HO}_2^-)$ ) and the average number of transferred electrons ( $n_e$ ) were calculated using the following equations (1) and (2), respectively.

$$n_e = 4 \frac{I_{disk}}{I_{disk} + \frac{I_{ring}}{N}} \quad (1)$$

$$X(\text{HO}_2^-) = 100 \frac{2 \frac{I_{ring}}{N}}{I_{disk} + \frac{I_{ring}}{N}} \quad (2)$$

The ORR durability of the catalysts was evaluated by chronoamperometry (CA) test in an O<sub>2</sub>-saturated 0.1 M KOH solution at a fixed rotation speed of 1600 rpm.

#### ■ Electrode correction

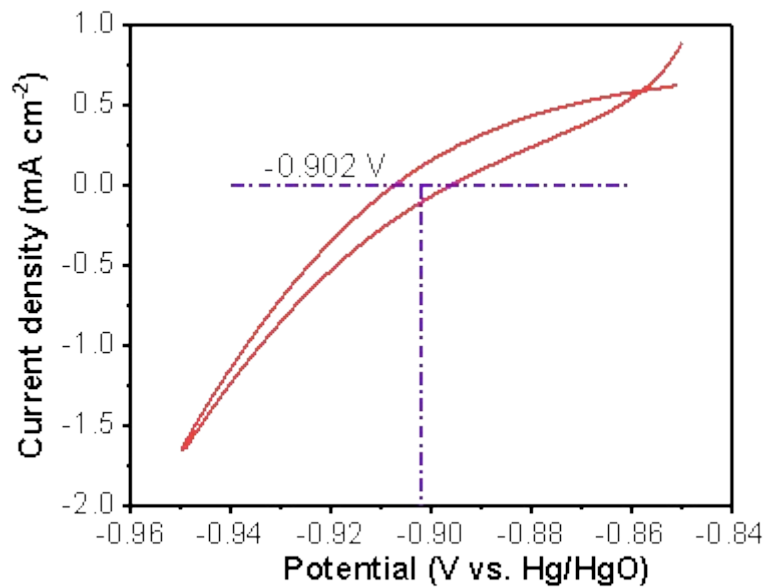

**Fig. S1.** Cyclic voltammetry curve at a scan rate of 20 mV s<sup>-1</sup> in H<sub>2</sub>-saturated 0.1 M KOH solution for RHE calibration.

The reference electrode was calibrated to a reversible hydrogen electrode (RHE). The RHE calibration was performed in a H<sub>2</sub>-saturated 0.1 M KOH solution at 25 °C and a Pt tablet with the area of 1 cm<sup>2</sup> was used as work electrode. Take the average value of the potential of two curves at zero current as the thermodynamic potential of hydrogen electrode reaction.

In 0.1 M KOH, the reversible hydrogen electrode correction formula of Hg/HgO reference electrode is:  $E(\text{RHE}) = E(\text{Hg/HgO}) + 0.902 \text{ V}$ .

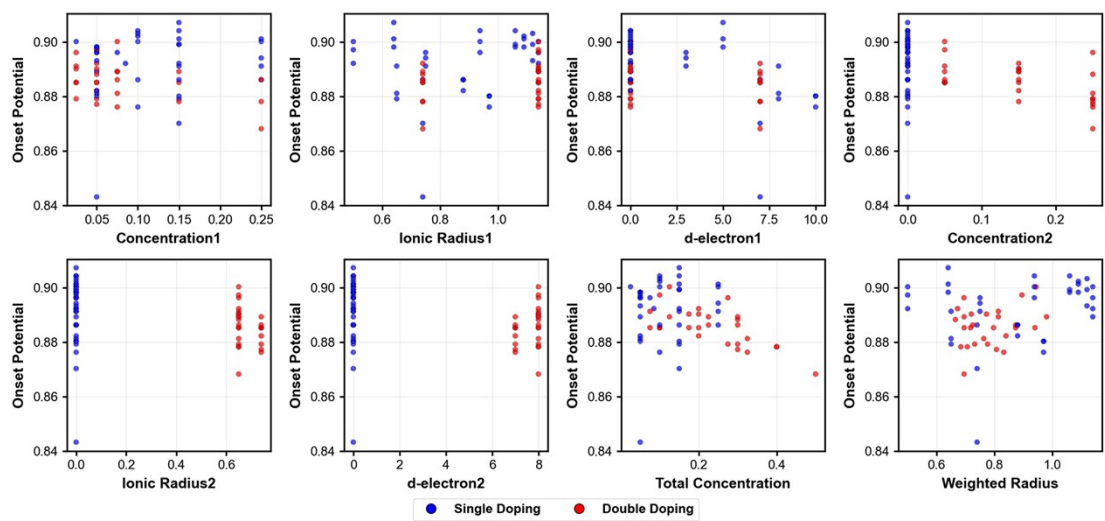

**Fig. S2.** The distribution plots of characteristic data with respect to onset potentials.

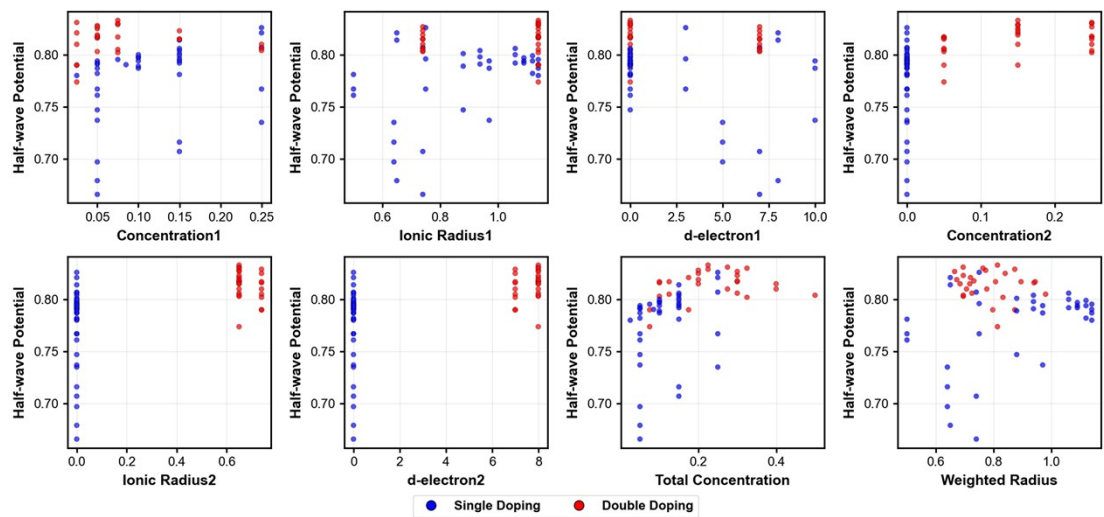

**Fig. S3.** The distribution plots of characteristic data with respect to half-wave potentials.

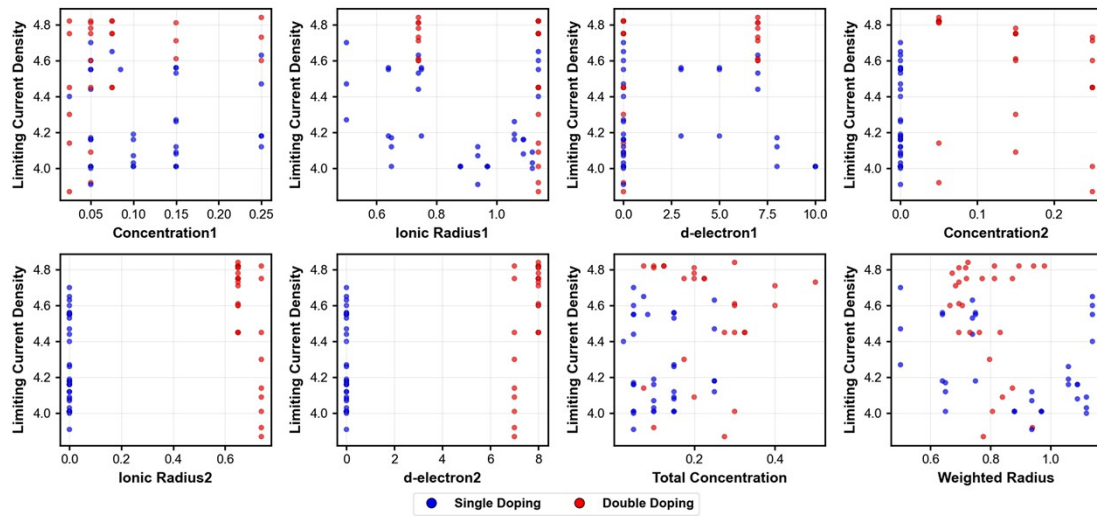

**Fig. S4.** The distribution plots of characteristic data with respect to limiting current densities.

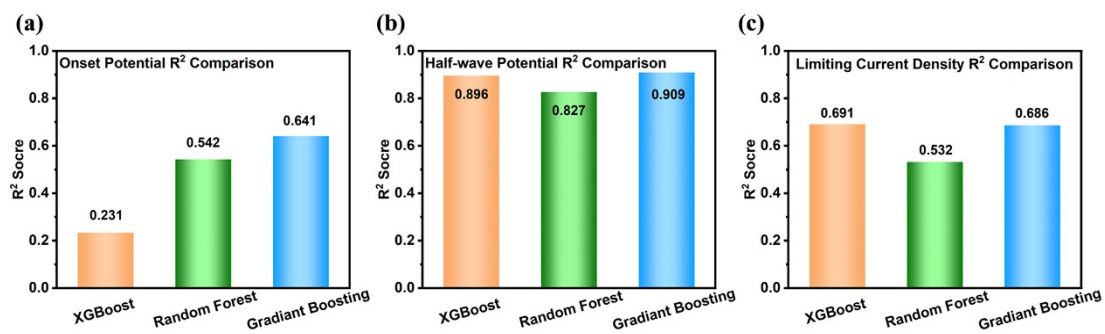

**Fig. S5.** Average  $R^2$  values of the three models (XGBoost, Random Forest, and Gradient Boosting) obtained from 1000 repeated training runs for the predictions of (a) onset potential, (b) half-wave potential, and (c) limiting current density.

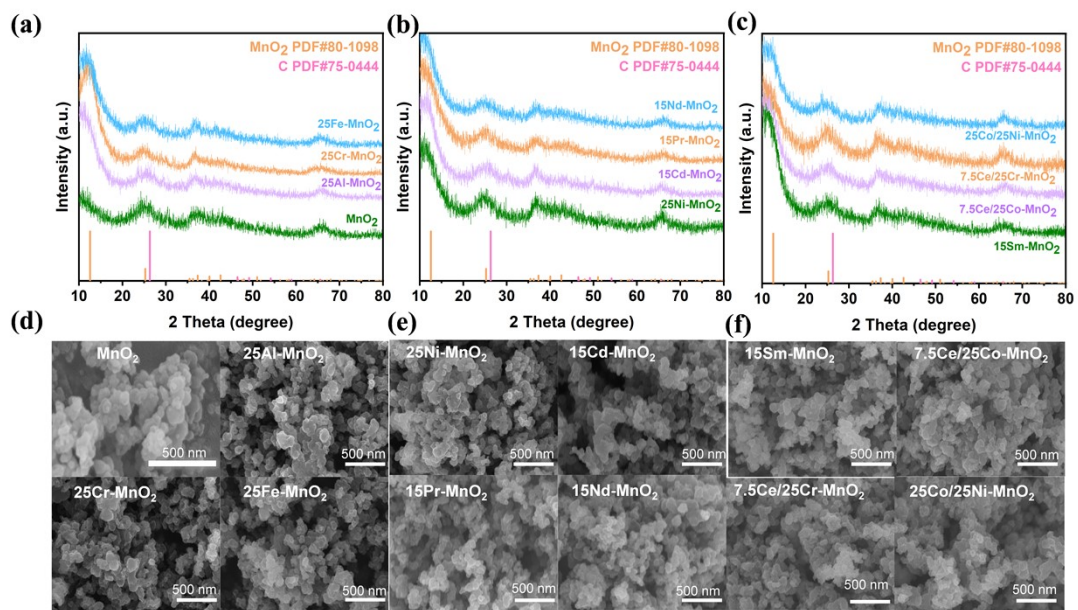

**Fig. S6.** (a-c) SEM images and (d-f) XRD patterns of  $\delta$ -MnO<sub>2</sub> with different metal dopants at their maximum concentrations.

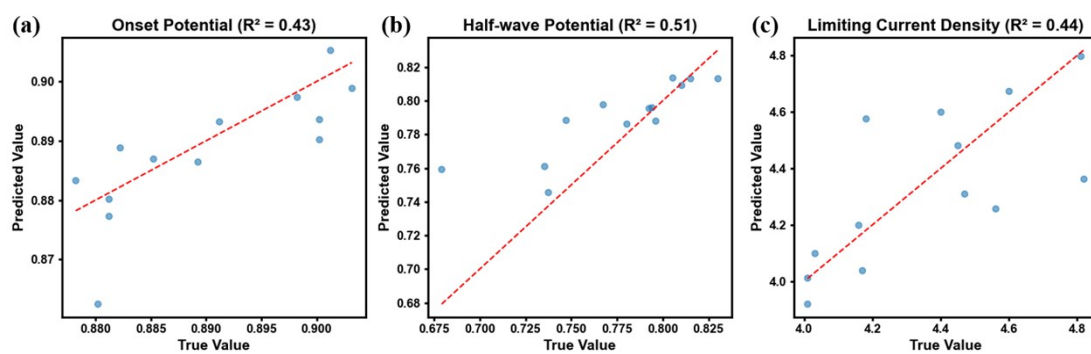

**Fig. S7.** Effect of removing highly correlated descriptors on model prediction performance

( $R^2$ ) for (a)  $E_{\text{onset}}$ , (b)  $E_{1/2}$ , and (c)  $J_L$ .

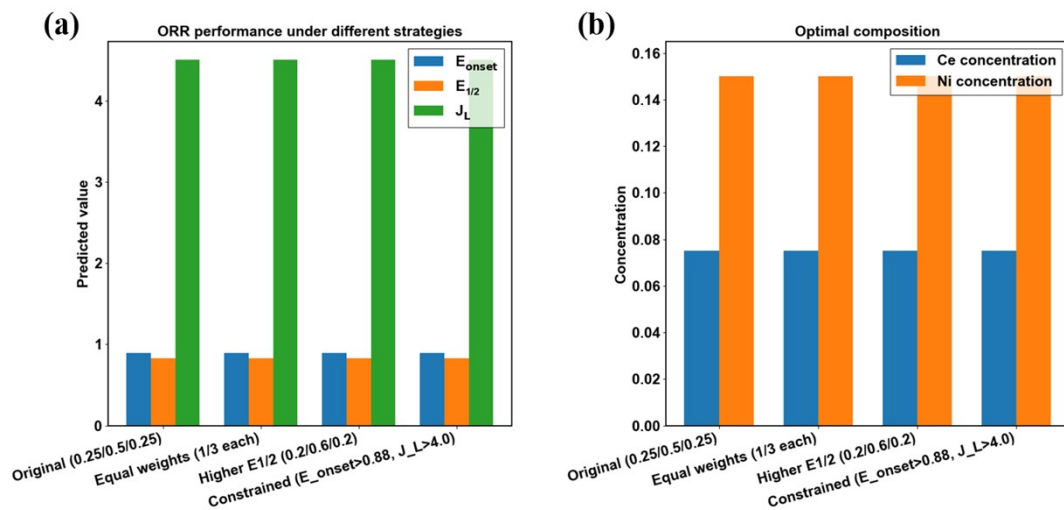

**Fig. S8.** Sensitivity analysis of the optimal composition under different multi-objective strategies: (a) Predicted ORR performance ( $E_{\text{onset}}$ ,  $E_{1/2}$ ,  $J_L$ ) for the optimal composition identified under each strategy and (b) Corresponding optimal Ce and Ni concentrations.

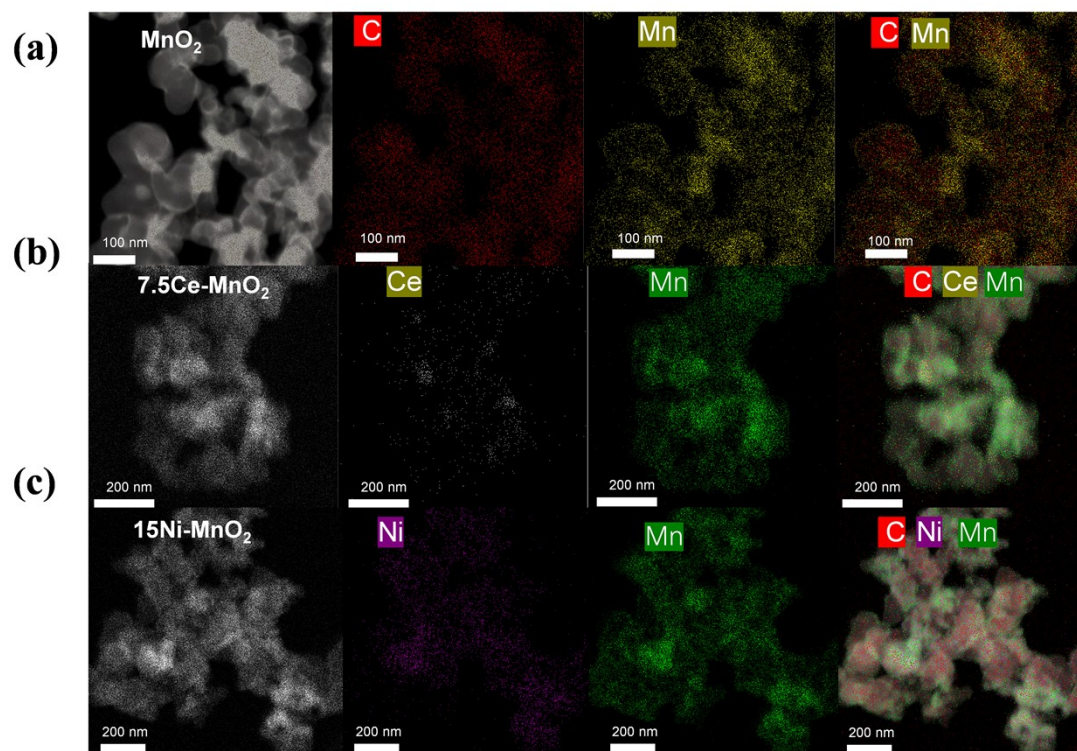

**Fig. S9.** EDS mappings of (a) MnO<sub>2</sub>, (b) 7.5Ce-MnO<sub>2</sub>, (c) 15Ni-MnO<sub>2</sub>.

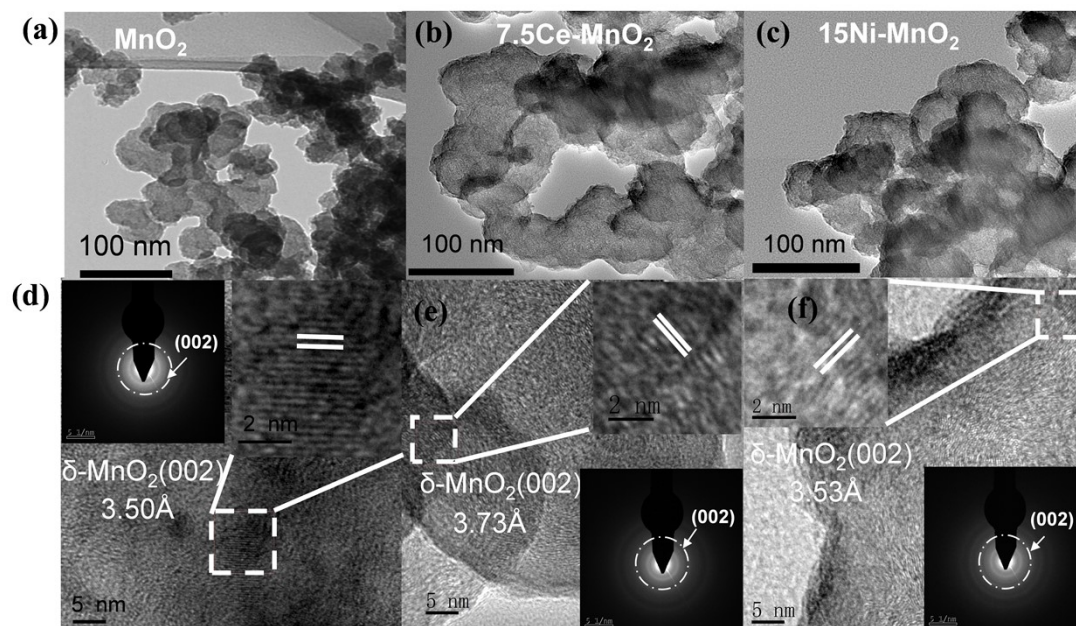

**Fig. S10.** TEM images of (a) MnO<sub>2</sub>, (b) 7.5Ce-MnO<sub>2</sub>, and (c) 15Ni-MnO<sub>2</sub>. HRTEM images and SAED patterns of (d) MnO<sub>2</sub>, (e) 7.5Ce-MnO<sub>2</sub>, and (f) 15Ni-MnO<sub>2</sub>.

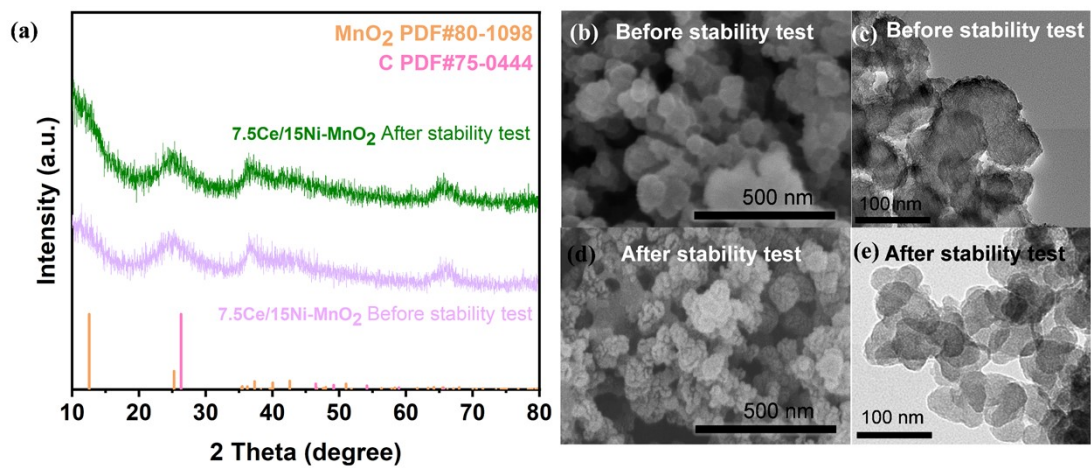

**Fig. S11.** (a) XRD patterns before and after the stability test. (b, c) SEM and TEM images before the stability test. (d, e) SEM and TEM images after the stability test.

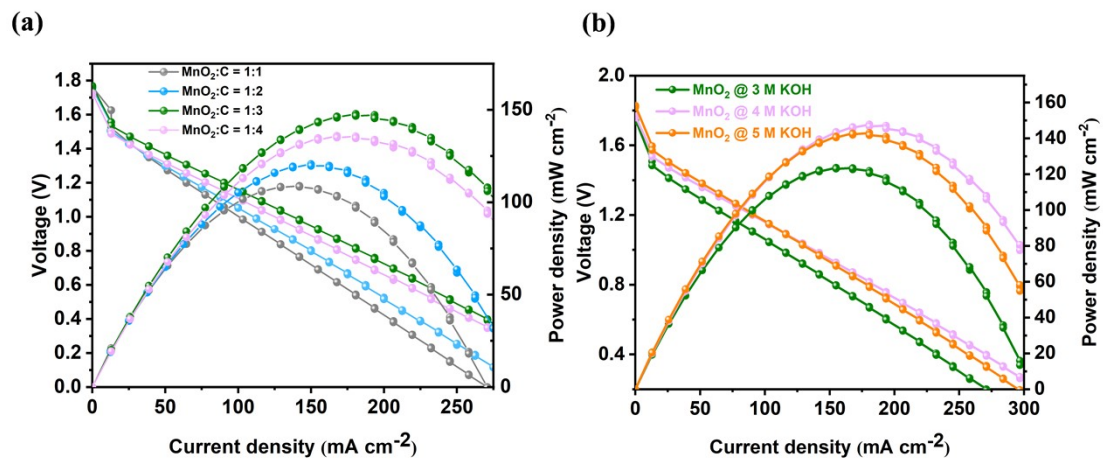

**Fig. S12.** Discharge polarization curves and corresponding power density curves of Al-air batteries with varying (a) Mn/C ratios and (b) KOH concentrations.

**Tab. S1.** Comprehensive data table of ORR onset potential, half-wave potential, and limiting current density for all samples.

| Sample name            | Onset potential (V) | Half-wave potential (V) | limiting current density (mA cm <sup>-2</sup> ) |
|------------------------|---------------------|-------------------------|-------------------------------------------------|
| MnO <sub>2</sub>       | 0.8972              | 0.6782                  | 4.5057                                          |
| 5Al-MnO <sub>2</sub>   | 0.8972              | 0.7612                  | 4.7000                                          |
| 15Al-MnO <sub>2</sub>  | 0.8922              | 0.7812                  | 4.2700                                          |
| 25Al-MnO <sub>2</sub>  | 0.9002              | 0.7672                  | 4.4700                                          |
| 5Fe-MnO <sub>2</sub>   | 0.8982              | 0.6972                  | 4.5500                                          |
| 15Fe-MnO <sub>2</sub>  | 0.9072              | 0.7162                  | 4.5600                                          |
| 25Fe-MnO <sub>2</sub>  | 0.9012              | 0.7352                  | 4.1800                                          |
| 5Co-MnO <sub>2</sub>   | 0.8432              | 0.6660                  | 4.4400                                          |
| 15Co-MnO <sub>2</sub>  | 0.8702              | 0.7072                  | 4.5300                                          |
| 25Co-MnO <sub>2</sub>  | 0.8862              | 0.8072                  | 4.6300                                          |
| 5Ni-MnO <sub>2</sub>   | 0.8812              | 0.6792                  | 4.1700                                          |
| 15Ni-MnO <sub>2</sub>  | 0.8792              | 0.8142                  | 4.0100                                          |
| 25Ni-MnO <sub>2</sub>  | 0.8912              | 0.8082                  | 4.1200                                          |
| 5Cr-MnO <sub>2</sub>   | 0.8962              | 0.7672                  | 4.5500                                          |
| 15Cr-MnO <sub>2</sub>  | 0.8912              | 0.7962                  | 4.5600                                          |
| 25Cr-MnO <sub>2</sub>  | 0.8942              | 0.8132                  | 4.1800                                          |
| 5Cd-MnO <sub>2</sub>   | 0.8962              | 0.7912                  | 3.9100                                          |
| 15Cd-MnO <sub>2</sub>  | 0.9002              | 0.7982                  | 4.0700                                          |
| 25Cd-MnO <sub>2</sub>  | 0.9042              | 0.8042                  | 4.1200                                          |
| 2.5Ce-MnO <sub>2</sub> | 0.9002              | 0.7802                  | 4.4000                                          |
| 5Ce-MnO <sub>2</sub>   | 0.8892              | 0.7872                  | 4.6000                                          |
| 7.5Ce-MnO <sub>2</sub> | 0.8962              | 0.7956                  | 4.6500                                          |
| 5Sr-MnO <sub>2</sub>   | 0.8932              | 0.7822                  | 4.0000                                          |
| 15Sr-MnO <sub>2</sub>  | 0.9032              | 0.7942                  | 4.0300                                          |
| 25Sr-MnO <sub>2</sub>  | 0.8992              | 0.7992                  | 4.0900                                          |
| 5Pr-MnO <sub>2</sub>   | 0.8982              | 0.7942                  | 4.1600                                          |

| Sample name                 | Onset potential (V) | Half-wave potential (V) | limiting current density (mA cm <sup>-2</sup> ) |
|-----------------------------|---------------------|-------------------------|-------------------------------------------------|
| 10Pr-MnO <sub>2</sub>       | 0.9022              | 0.7972                  | 4.1600                                          |
| 15Pr-MnO <sub>2</sub>       | 0.9012              | 0.7922                  | 4.0800                                          |
| 5Nd-MnO <sub>2</sub>        | 0.8982              | 0.7922                  | 4.1600                                          |
| 10Nd-MnO <sub>2</sub>       | 0.9042              | 0.8002                  | 4.1900                                          |
| 15Nd-MnO <sub>2</sub>       | 0.8992              | 0.8062                  | 4.2600                                          |
| 5Sm-MnO <sub>2</sub>        | 0.8802              | 0.7372                  | 4.0100                                          |
| 10Sm-MnO <sub>2</sub>       | 0.8762              | 0.7872                  | 4.0100                                          |
| 15Sm-MnO <sub>2</sub>       | 0.8802              | 0.7942                  | 4.0100                                          |
| 5Gd-MnO <sub>2</sub>        | 0.8822              | 0.7472                  | 4.0100                                          |
| 10Gd-MnO <sub>2</sub>       | 0.8862              | 0.7892                  | 4.0100                                          |
| 15Gd-MnO <sub>2</sub>       | 0.8862              | 0.8012                  | 4.0100                                          |
| 2.5Ce/5Co-MnO <sub>2</sub>  | 0.8852              | 0.7902                  | 4.1400                                          |
| 2.5Ce/15Co-MnO <sub>2</sub> | 0.8852              | 0.7902                  | 4.3000                                          |
| 2.5Ce/25Co-MnO <sub>2</sub> | 0.8792              | 0.8102                  | 3.8700                                          |
| 5Ce/5Co-MnO <sub>2</sub>    | 0.8852              | 0.8162                  | 3.9200                                          |
| 5Ce/15Co-MnO <sub>2</sub>   | 0.8822              | 0.8202                  | 4.0900                                          |
| 5Ce/25Co-MnO <sub>2</sub>   | 0.8772              | 0.8172                  | 4.0100                                          |
| 7.5Ce/5Co-MnO <sub>2</sub>  | 0.8892              | 0.8052                  | 4.8200                                          |
| 7.5Ce/15Co-MnO <sub>2</sub> | 0.8862              | 0.8222                  | 4.7500                                          |
| 7.5Ce/25Co-MnO <sub>2</sub> | 0.8762              | 0.8022                  | 4.4500                                          |
| 5Co/5Ni-MnO <sub>2</sub>    | 0.8852              | 0.8032                  | 4.8100                                          |
| 5Co/15Ni-MnO <sub>2</sub>   | 0.8922              | 0.8192                  | 4.7800                                          |
| 5Co/25Ni-MnO <sub>2</sub>   | 0.8882              | 0.8180                  | 4.6000                                          |
| 15Co/5Ni-MnO <sub>2</sub>   | 0.8852              | 0.8152                  | 4.8100                                          |
| 15Co/15Ni-MnO <sub>2</sub>  | 0.8892              | 0.8202                  | 4.6100                                          |
| 15Co/25Ni-MnO <sub>2</sub>  | 0.8782              | 0.8152                  | 4.7100                                          |
| 25Co/5Ni-MnO <sub>2</sub>   | 0.8862              | 0.8062                  | 4.8400                                          |
| 25Co/15Ni-MnO <sub>2</sub>  | 0.8782              | 0.8102                  | 4.6000                                          |

| Sample name                 | Onset potential (V) | Half-wave potential (V) | limiting current density (mA cm <sup>-2</sup> ) |
|-----------------------------|---------------------|-------------------------|-------------------------------------------------|
| 25Co/25Ni-MnO <sub>2</sub>  | 0.8682              | 0.8042                  | 4.7300                                          |
| 2.5Ce/5Cr-MnO <sub>2</sub>  | 0.8912              | 0.7740                  | 4.8200                                          |
| 2.5Ce/15Cr-MnO <sub>2</sub> | 0.8902              | 0.8212                  | 4.7500                                          |
| 2.5Ce/25Cr-MnO <sub>2</sub> | 0.8962              | 0.8222                  | 4.4500                                          |
| 5Ce/5Cr-MnO <sub>2</sub>    | 0.8972              | 0.8172                  | 4.8200                                          |
| 5Ce/15Cr-MnO <sub>2</sub>   | 0.8902              | 0.8232                  | 4.7500                                          |
| 5Ce/25Cr-MnO <sub>2</sub>   | 0.8792              | 0.8180                  | 4.4500                                          |
| 7.5Ce/5Cr-MnO <sub>2</sub>  | 0.9002              | 0.8172                  | 4.8200                                          |
| 7.5Ce/15Cr-MnO <sub>2</sub> | 0.8892              | 0.8232                  | 4.7500                                          |
| 7.5Ce/25Cr-MnO <sub>2</sub> | 0.8812              | 0.8222                  | 4.4500                                          |

**Tab. S2.** Variance inflation factor (VIF) values for the features.

| Feature         | VIF      | Feature         | VIF       |
|-----------------|----------|-----------------|-----------|
| Concentration 1 | 12527.52 | $\Delta r1$ -Mn | 72.316536 |
| Ion Radius 1    | 13637.31 | $\Delta r2$ -Mn | inf       |
| d-Electron 1    | 15380.59 | Total Conc.     | inf       |
| Concentration 2 | inf      | Conc. Ratio     | 33.69     |
| Ion Radius 2    | inf      | Conc. Product   | 11.35     |
| d-Electron 2    | inf      | Radius Diff.    | inf       |
| r1 vs Mn        | inf      | Weighted Radius | 11727.11  |
| r2 vs Mn        | inf      |                 |           |
